# Supplementary material for: Molecular basis for the activation of human spliceosome
Source: PubMed Central journal article supplement — Nat Commun. 2024 Jul 27;15:6348. doi: 10.1038/s41467-024-50785-0 (PMC11283556; doi:10.1038/s41467-024-50785-0), 2024-07-27
Supplement: 41467_2024_50785_MOESM3_ESM.pdf [file 41467_2024_50785_MOESM3_ESM.pdf]

## Description of Additional Supplementary Files

File Name: Supplementary Movie 1

Description: **The morph of the conformational changes for the RNA elements during human spliceosome activation.** Structures of the six intermediate activated spliceosomes and the newly resolved C complex reveal a dynamic process of RNA movement. The morph was generated using ChimeraX.
